# Supplementary material
Source: publisher figshare collection journal article supplement (https://gsajournals.figshare.com/ndownloader/files/25816556)
Supplement: Supplementary file 1 [file 25816556]

## Sheet: Sheet1
Table S3. Primers for qRT-PCR of serotonin receptors.
Gene symbol	Forward	Reverse
Ppa-cdc-42	CTCTCTTATCCACAGACGGAC	GAAGGGAGTGCGTGAGCAGTG
Ppa-ser-1	CATTGGTCGAGGACACACAC	TAGGTCTAATCATGCTCTCATCTGC
Ppa-ser-4	ACGAGTTATTGGAATGCTCGC	AGGAAAGTAGAATGCACAACACG
Ppa-ser-5	CTCAATCCGATCATCTACTCG	ATGCGGTCGAGACTTGCG
Ppa-ser-7	CACCGACCATCATTCATCCTTC	CCCATCATGACTCCAAGCG
Ppa-mod-1	ACCCGAATCAGAAGAATCGGTC	TTCTTGCATGCTGGGAGATG
